# Supplementary material for: Epigenetic Variability Confounds Transcriptome but Not Proteome Profiling for Coexpression-based Gene Function Prediction
Source: PubMed Central journal article supplement (PMC6210221; doi:10.1074/mcp.ra118.000935), 2018-07-24
Supplement: 138987_1_supp_165903_pblqbf.pdf [file 138987_1_supp_165903_pblqbf.pdf]

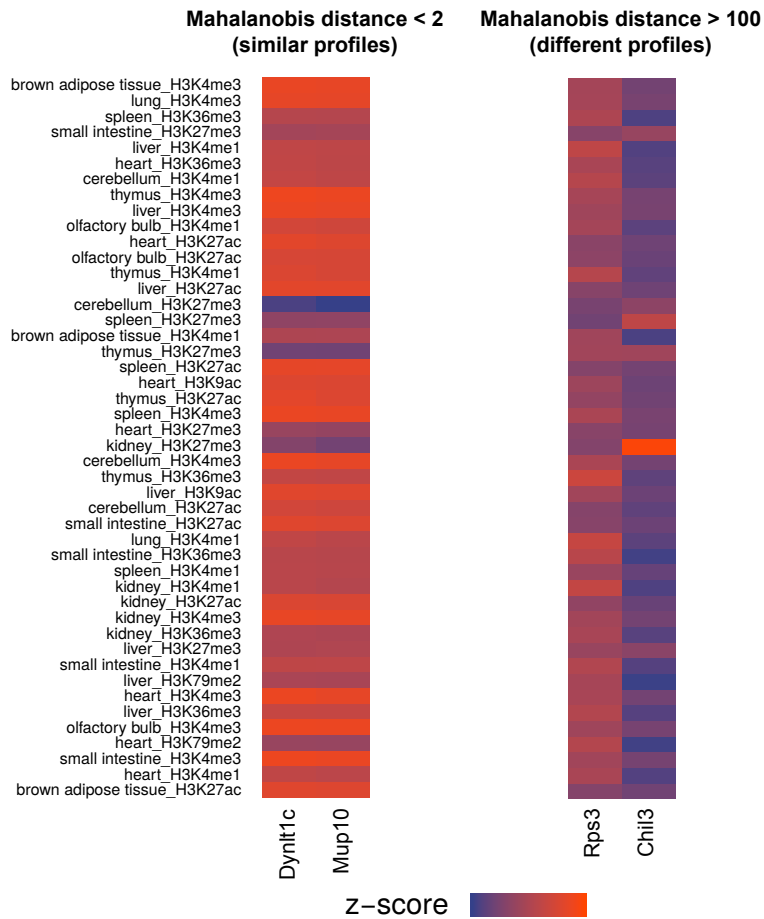

**Supplemental Figure S5. Examples of epigenetically similar and dissimilar gene pairs.**

Mahalanobis distance was used to assess similarities of tissue-specific epigenetic signals for gene pairs. The robustness of this analysis is conferred by many data points for each gene.
