# Supplementary material for: Epigenetic Variability Confounds Transcriptome but Not Proteome Profiling for Coexpression-based Gene Function Prediction
Source: PubMed Central journal article supplement (PMC6210221; doi:10.1074/mcp.ra118.000935), 2018-07-24
Supplement: 138987_1_supp_165905_pblqbg.pdf [file 138987_1_supp_165905_pblqbg.pdf]

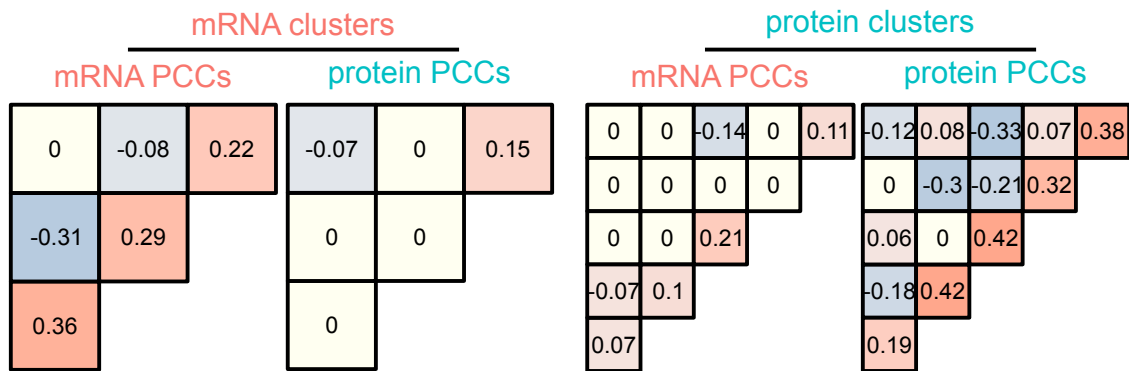

**Supplemental Figure S3 Median Pearson correlation coefficients (PCCs) of co-regulation clusters.**

Using median protein PCCs grouped by mRNA clusters (and vice versa) shows that there is a limited relation between the mRNA and protein clusters. The absolute PCC values  $\leq 0.05$  were rounded down to 0 for visual clarity.
