# Supplementary material for: Epigenetic Variability Confounds Transcriptome but Not Proteome Profiling for Coexpression-based Gene Function Prediction
Source: PubMed Central journal article supplement (PMC6210221; doi:10.1074/mcp.ra118.000935), 2018-07-24
Supplement: 138987_1_supp_165907_pblqbg.pdf [file 138987_1_supp_165907_pblqbg.pdf]

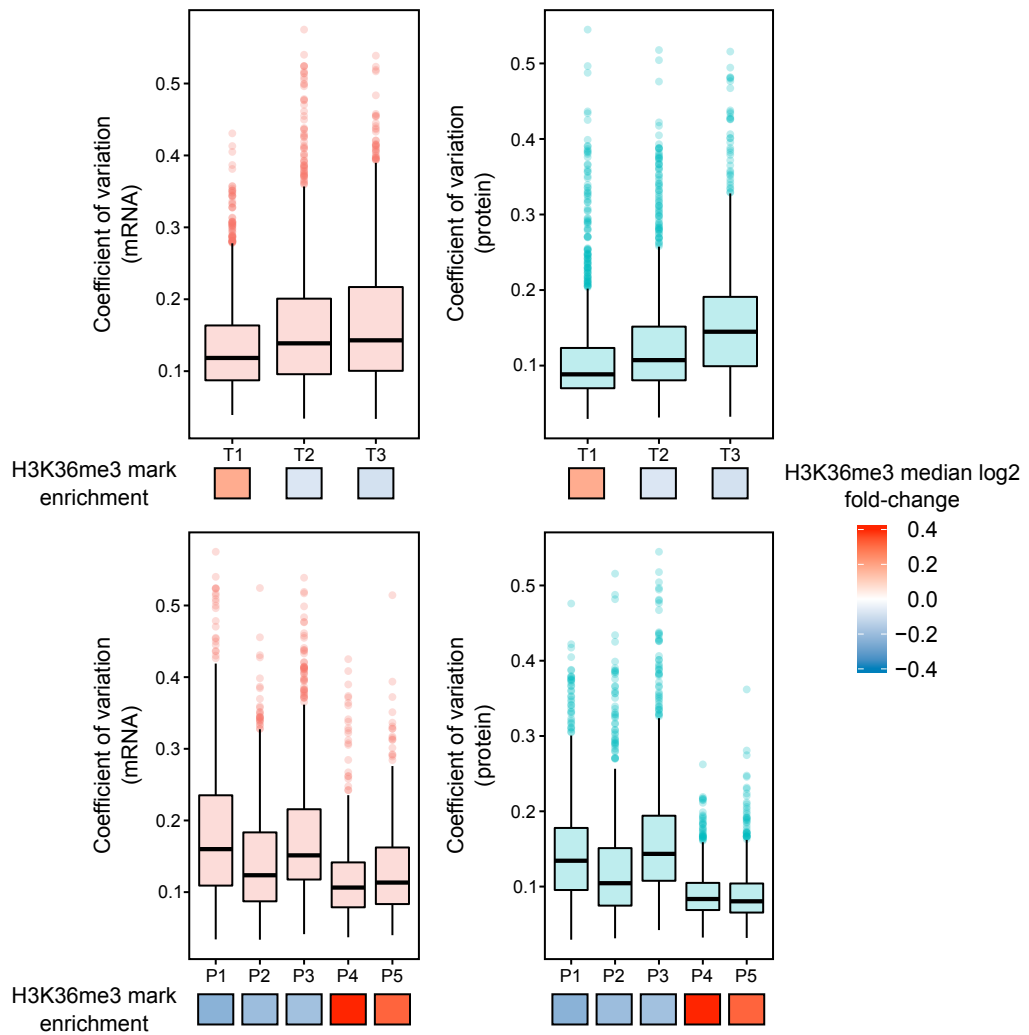

**Supplemental Figure S4 A** H3K36me3 signal is enriched in clusters with lowest expression variability (clusters T1, P4 and P5). The gene expression variability is significantly lower for T1 cluster compared to T2 (Kolmogorov-Smirnov test P-value < 0.0001).

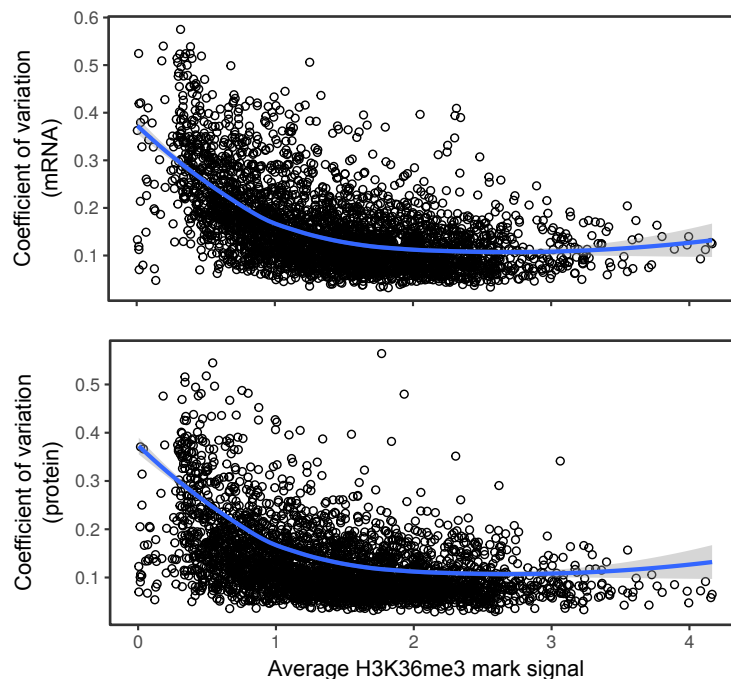

**Supplemental Figure S4 B** Genes with the highest expression variability on both mRNA and protein level have the lowest H3K36me3 signal.
