# Supplementary material for: Epigenetic Variability Confounds Transcriptome but Not Proteome Profiling for Coexpression-based Gene Function Prediction
Source: PubMed Central journal article supplement (PMC6210221; doi:10.1074/mcp.ra118.000935), 2018-07-24
Supplement: 138987_1_supp_165910_pblqbg.pdf [file 138987_1_supp_165910_pblqbg.pdf]

## Supplemental Table S1

List of RNAseq experiments and sources of downloaded data.

| Tissue type and details:                                                                            | Source:                                                                                                                                                                                                                                                        |
|-----------------------------------------------------------------------------------------------------|----------------------------------------------------------------------------------------------------------------------------------------------------------------------------------------------------------------------------------------------------------------|
| <b>Adrenal gland</b> , <i>mus musculus</i> , mixed sex littermates, adult, 8 weeks                  | ENCODE<br><a href="https://www.encodeproject.org/experiments/ENCSR000BYX">https://www.encodeproject.org/experiments/ENCSR000BYX</a><br><br>Ref: <a href="http://www.ncbi.nlm.nih.gov/pubmed/25409824">http://www.ncbi.nlm.nih.gov/pubmed/25409824</a>          |
| <b>Brain cortex</b> , <i>mus musculus</i> , males, adult, 8 weeks                                   | ENCODE<br><a href="https://www.encodeproject.org/experiments/ENCSR000CLJ">https://www.encodeproject.org/experiments/ENCSR000CLJ</a><br><br>Ref: <a href="http://www.ncbi.nlm.nih.gov/pubmed/25409824">http://www.ncbi.nlm.nih.gov/pubmed/25409824</a>          |
| <b>Brown adipose tissue</b> , <i>mus musculus</i> , males, adult, 24 weeks                          | ENCODE<br><a href="https://www.encodeproject.org/experiments/ENCSR000CHN">https://www.encodeproject.org/experiments/ENCSR000CHN</a><br><br>Ref: <a href="http://www.ncbi.nlm.nih.gov/pubmed/25409824">http://www.ncbi.nlm.nih.gov/pubmed/25409824</a>          |
| <b>Cerebellum</b> , <i>mus musculus</i> , mixed sex littermates, adult, 8 weeks                     | ENCODE<br><a href="https://www.encodeproject.org/experiments/ENCSR000BZM">https://www.encodeproject.org/experiments/ENCSR000BZM</a><br><br>Ref: <a href="http://www.ncbi.nlm.nih.gov/pubmed/25409824">http://www.ncbi.nlm.nih.gov/pubmed/25409824</a>          |
| <b>Duodenum</b> , <i>mus musculus</i> , mixed sex littermates, adult, 8 weeks                       | ENCODE<br><a href="https://www.encodeproject.org/experiments/ENCSR000BYY">https://www.encodeproject.org/experiments/ENCSR000BYY</a><br><br>Ref: <a href="http://www.ncbi.nlm.nih.gov/pubmed/25409824">http://www.ncbi.nlm.nih.gov/pubmed/25409824</a>          |
| <b>Embryonic tissue</b> , <i>mus musculus</i> , males, embryonic, 11.5 days                         | ENCODE<br><a href="https://www.encodeproject.org/experiments/ENCSR000CLL">https://www.encodeproject.org/experiments/ENCSR000CLL</a><br><br>Ref: <a href="http://www.ncbi.nlm.nih.gov/pubmed/25409824">http://www.ncbi.nlm.nih.gov/pubmed/25409824</a>          |
| <b>Eye</b> , <i>mus musculus</i> , females, adult, 4 weeks<br><br>Note: wild-type control data used | GEO<br><a href="http://www.ncbi.nlm.nih.gov/geo/query/acc.cgi?acc=GSM737548">http://www.ncbi.nlm.nih.gov/geo/query/acc.cgi?acc=GSM737548</a><br><br>Ref: <a href="http://www.ncbi.nlm.nih.gov/pubmed/21659555">http://www.ncbi.nlm.nih.gov/pubmed/21659555</a> |
| <b>Heart</b> , <i>mus musculus</i> , mixed sex littermates, adult, 8 weeks                          | ENCODE<br><a href="https://www.encodeproject.org/experiments/ENCSR000BYQ">https://www.encodeproject.org/experiments/ENCSR000BYQ</a><br><br>Ref: <a href="http://www.ncbi.nlm.nih.gov/pubmed/25409824">http://www.ncbi.nlm.nih.gov/pubmed/25409824</a>          |

|                                                                                      |                                                                                                                                                                                                                                                                       |
|--------------------------------------------------------------------------------------|-----------------------------------------------------------------------------------------------------------------------------------------------------------------------------------------------------------------------------------------------------------------------|
| <b>Kidney</b> , <i>mus musculus</i> , mixed sex littermates, adult, 8 weeks          | <p>ENCODE<br/> <a href="https://www.encodeproject.org/experiments/ENCSR000BYR">https://www.encodeproject.org/experiments/ENCSR000BYR</a></p> <p>Ref: <a href="http://www.ncbi.nlm.nih.gov/pubmed/25409824">http://www.ncbi.nlm.nih.gov/pubmed/25409824</a></p>        |
| <b>Large intestine</b> , <i>mus musculus</i> , mixed sex littermates, adult, 8 weeks | <p>ENCODE<br/> <a href="https://www.encodeproject.org/experiments/ENCSR000BZA">https://www.encodeproject.org/experiments/ENCSR000BZA</a></p> <p>Ref: <a href="http://www.ncbi.nlm.nih.gov/pubmed/25409824">http://www.ncbi.nlm.nih.gov/pubmed/25409824</a></p>        |
| <b>Liver</b> , <i>mus musculus</i> , mixed sex littermates, adult, 8 weeks           | <p>ENCODE<br/> <a href="https://www.encodeproject.org/experiments/ENCSR000BYS">https://www.encodeproject.org/experiments/ENCSR000BYS</a></p> <p>Ref: <a href="http://www.ncbi.nlm.nih.gov/pubmed/25409824">http://www.ncbi.nlm.nih.gov/pubmed/25409824</a></p>        |
| <b>Lung</b> , <i>mus musculus</i> , mixed sex littermates, adult, 8 weeks            | <p>ENCODE<br/> <a href="https://www.encodeproject.org/experiments/ENCSR000BYT">https://www.encodeproject.org/experiments/ENCSR000BYT</a></p> <p>Ref: <a href="http://www.ncbi.nlm.nih.gov/pubmed/25409824">http://www.ncbi.nlm.nih.gov/pubmed/25409824</a></p>        |
| <b>Ovary</b> , <i>mus musculus</i> , females, adult, 8 weeks                         | <p>ENCODE<br/> <a href="https://www.encodeproject.org/experiments/ENCSR000BZC">https://www.encodeproject.org/experiments/ENCSR000BZC</a></p> <p>Ref: <a href="http://www.ncbi.nlm.nih.gov/pubmed/25409824">http://www.ncbi.nlm.nih.gov/pubmed/25409824</a></p>        |
| <b>Pancreas</b> , <i>mus musculus</i> , females, adult, 12 weeks                     | <p>GEO<br/> <a href="http://www.ncbi.nlm.nih.gov/geo/query/acc.cgi?acc=GSE21860">http://www.ncbi.nlm.nih.gov/geo/query/acc.cgi?acc=GSE21860</a></p> <p>Ref: <a href="http://www.ncbi.nlm.nih.gov/pubmed/20581837">http://www.ncbi.nlm.nih.gov/pubmed/20581837</a></p> |
| <b>Skeletal muscle</b> , <i>mus musculus</i> , male, adult, 8 weeks                  | <p>ENCODE<br/> <a href="https://www.encodeproject.org/experiments/ENCSR000CME">https://www.encodeproject.org/experiments/ENCSR000CME</a></p> <p>Ref: <a href="http://www.ncbi.nlm.nih.gov/pubmed/25409824">http://www.ncbi.nlm.nih.gov/pubmed/25409824</a></p>        |
| <b>Spleen</b> , <i>mus musculus</i> , male, adult, 8 weeks                           | <p>ENCODE<br/> <a href="https://www.encodeproject.org/experiments/ENCSR000CGW">https://www.encodeproject.org/experiments/ENCSR000CGW</a></p> <p>Ref: <a href="http://www.ncbi.nlm.nih.gov/pubmed/25409824">http://www.ncbi.nlm.nih.gov/pubmed/25409824</a></p>        |
| <b>Stomach</b> , <i>mus musculus</i> , mixed sex littermates, adult, 8 weeks         | <p>ENCODE<br/> <a href="https://www.encodeproject.org/experiments/ENCSR000BZE">https://www.encodeproject.org/experiments/ENCSR000BZE</a></p> <p>Ref: <a href="http://www.ncbi.nlm.nih.gov/pubmed/25409824">http://www.ncbi.nlm.nih.gov/pubmed/25409824</a></p>        |

|                                                                                                                                |                                                                                                                                                                                                                                                                               |
|--------------------------------------------------------------------------------------------------------------------------------|-------------------------------------------------------------------------------------------------------------------------------------------------------------------------------------------------------------------------------------------------------------------------------|
| <p><b>Subcutaneous adipose tissue</b>, <i>mus musculus</i>, mixed sex littermates, adult, 8 weeks</p>                          | <p>ENCODE<br/> <a href="https://www.encodeproject.org/experiments/ENCSR000BZF">https://www.encodeproject.org/experiments/ENCSR000BZF</a><br/>           Ref: <a href="http://www.ncbi.nlm.nih.gov/pubmed/25409824">http://www.ncbi.nlm.nih.gov/pubmed/25409824</a></p>        |
| <p><b>Thymus</b>, <i>mus musculus</i>, mixed sex littermates, adult, 8 weeks</p>                                               | <p>ENCODE<br/> <a href="https://www.encodeproject.org/experiments/ENCSR000BYV">https://www.encodeproject.org/experiments/ENCSR000BYV</a><br/>           Ref: <a href="http://www.ncbi.nlm.nih.gov/pubmed/25409824">http://www.ncbi.nlm.nih.gov/pubmed/25409824</a></p>        |
| <p><b>Uterus</b>, <i>mus musculus</i>, females, immature, 25 days<br/><br/>           Note: wild-type control samples used</p> | <p>GEO<br/> <a href="http://www.ncbi.nlm.nih.gov/geo/query/acc.cgi?acc=GSE47019">http://www.ncbi.nlm.nih.gov/geo/query/acc.cgi?acc=GSE47019</a><br/>           Ref: <a href="http://www.ncbi.nlm.nih.gov/pubmed/24503642">http://www.ncbi.nlm.nih.gov/pubmed/24503642</a></p> |
